# Supplementary material
Source: PubMed Central journal article supplement (PMC3131480)
Supplement: NIHMS299919-supplement-1.pdf [file NIHMS299919-supplement-1.pdf]

## **Reactive oxygen species inhibitors block priming, but not activation of the NLRP3 inflammasome**

Franz Bauernfeind<sup>\*, ‡</sup>, Eva Bartok<sup>\*, ‡</sup>, Anna Rieger<sup>\*</sup>, Luigi Franchi<sup>†</sup>, Gabriel Núñez<sup>†</sup> and Veit Hornung<sup>\*, ¶</sup>

<sup>\*</sup> Institute for Clinical Chemistry and Pharmacology, Unit for Clinical Biochemistry, University Hospital, University of Bonn, Germany

<sup>†</sup> University of Michigan Medical School, Department of Pathology and Comprehensive Cancer Center, Ann Arbor, Michigan 48109, USA

<sup>‡</sup> equal contributors

### **Supplemental Material:**

**Supplemental Figure 1: The NADPH oxidase complex is not involved in the activation of the NLRP3 inflammasome.** A-B, Macrophages from wild type mice or mice deficient in the NADPH oxidase subunit p47<sup>phox</sup> (Ncf1m1J/J), p91<sup>phox</sup> (Cybb) or p22<sup>phox</sup> (Cyba) were stimulated with LPS (A) or LPS + Silica (B) for 6 hours. TNF (A) and IL-1b (B) were measured by ELISA. C, LPS-primed macrophages from wild type mice or mice deficient in p22<sup>phox</sup> (Cyba) were stimulated with *Staphylococcus aureus* supernatant (S.a.), Silica or ATP and IL-1b production was measured by ELISA. The expression of p22<sup>phox</sup> was evaluated by immunoblotting (insert). D, The activation of caspase-1 was analyzed in extracts prepared from cell and culture supernatants immunoblotted with caspase-1 antibody. Arrows denote procaspase-1 (p45) and its processed p20 subunit. E, Wild type macrophages (WT), macrophages transduced with GFP (WT-GFP) or NLRP3-deficient macrophages transduced with NLRP3-IRES-GFP were stimulated as indicated. Immunoblotting of GFP, NLRP3,

procaspase-1 and cleaved caspase-1 is shown (A). F, Wild type macrophages were stimulated with LPS + Nigericin or flagellin after incubation with 100 ng/ml cycloheximide (CHX) and IL-18 release was measured by ELISA. Results are representative of three (A-D) or two (E-F) separate experiments.

**Supplemental Figure 2: Altering the redox state of macrophages inhibits LPS induced cell priming.** Wild type macrophages were pretreated with the indicated concentration of DPI (A-C) or NAC (D-G) for 1 h and then stimulated as indicated. IL-1 $\beta$  secretion of LPS-primed (200 ng/ml) cells stimulated with ATP, Nigericin, Silica, or poly(dA:dT) (A and D) is shown. B and E, IL-1 $\beta$  protein concentration and mRNA level in cell lysates is depicted. C and F, TNF mRNA and NLRP3 mRNA expression of LPS-stimulated cells is shown. G, Wild type or NLRP3-deficient macrophages reconstituted with NLRP3 were stimulated as indicated and caspase-1 cleavage was assessed. Data from one representative experiment out of three are shown (A-G).

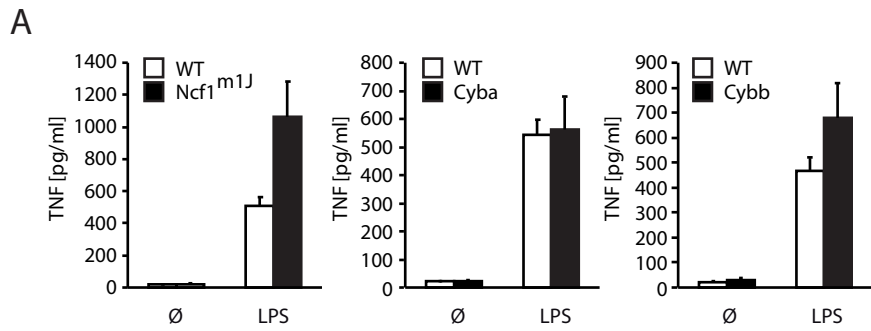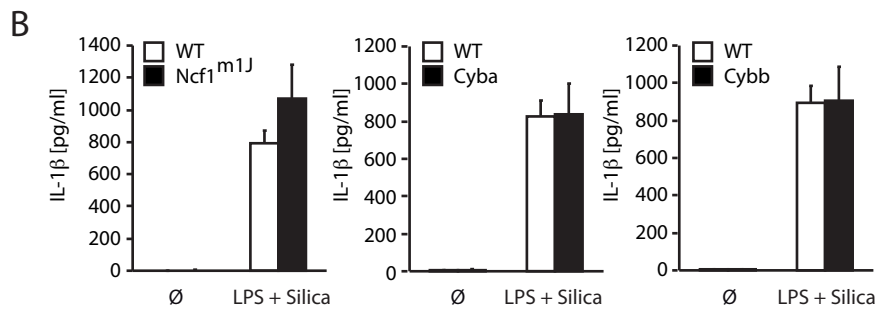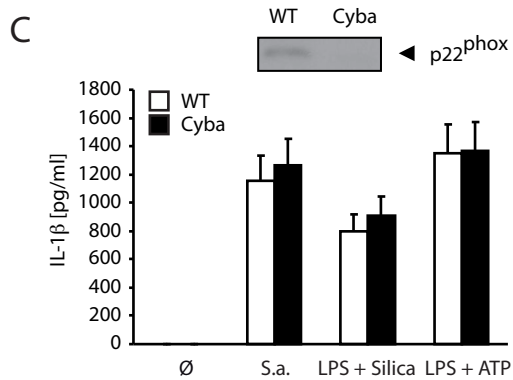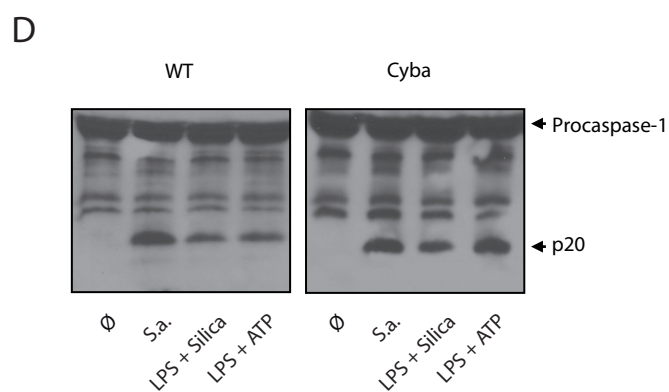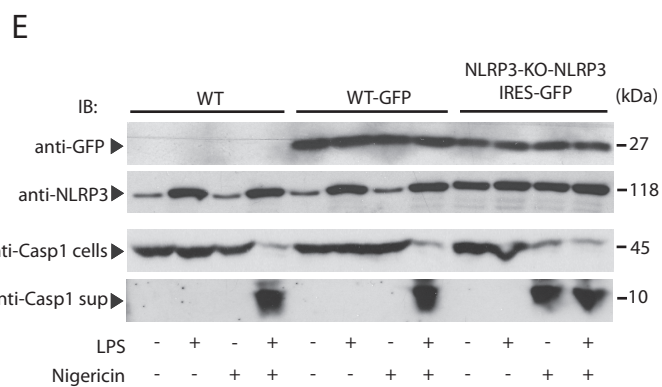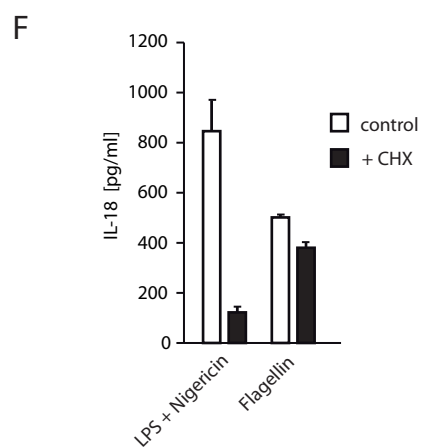

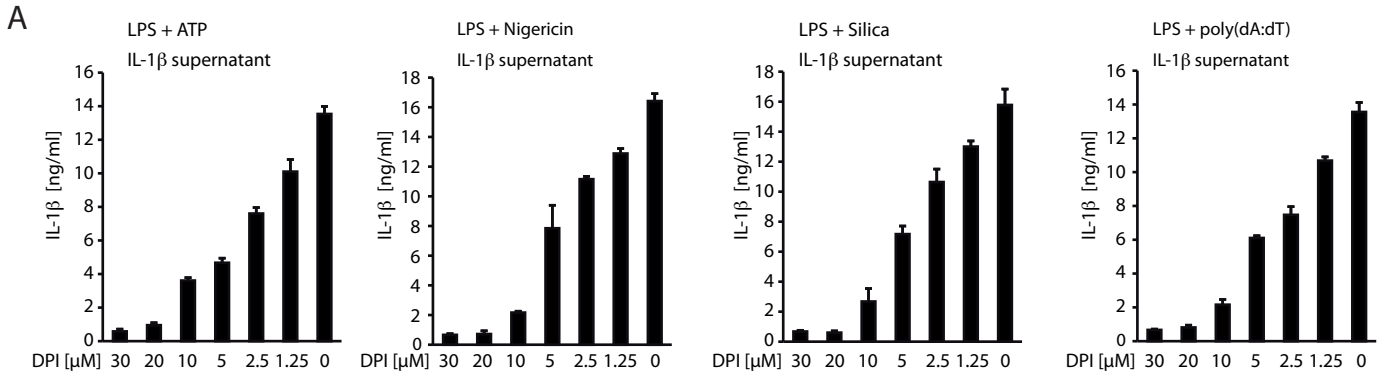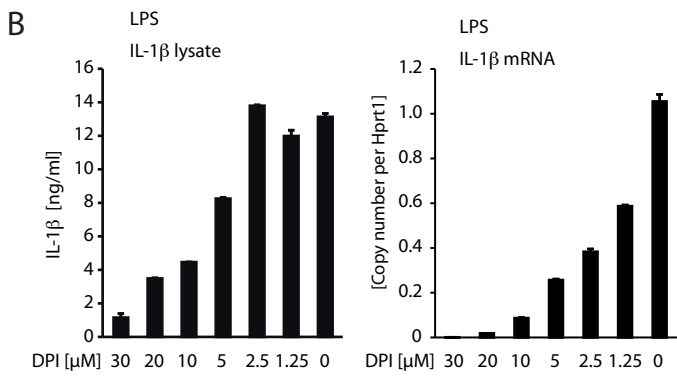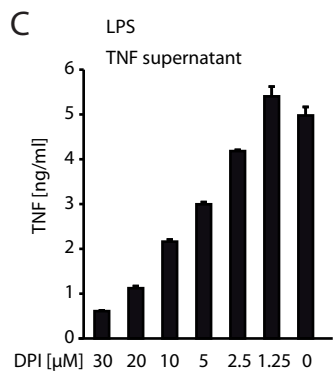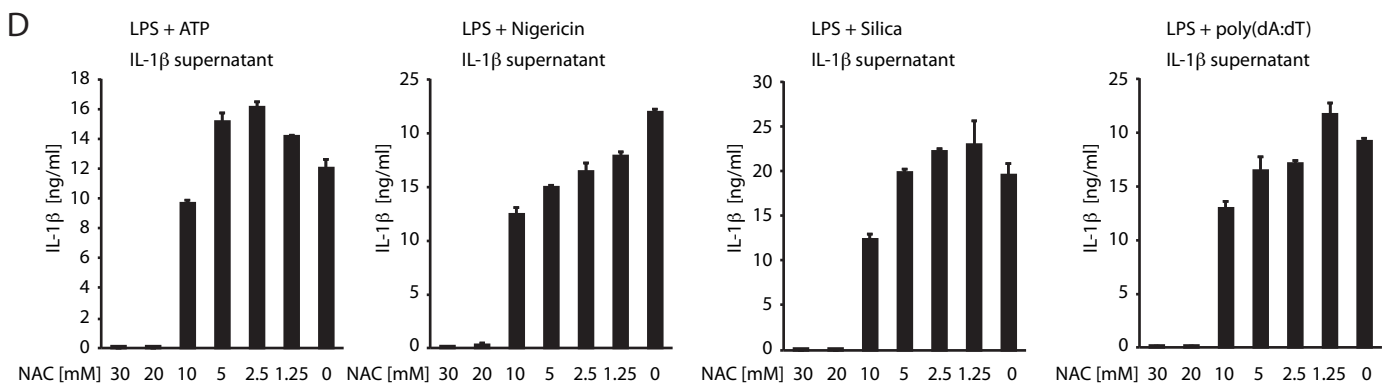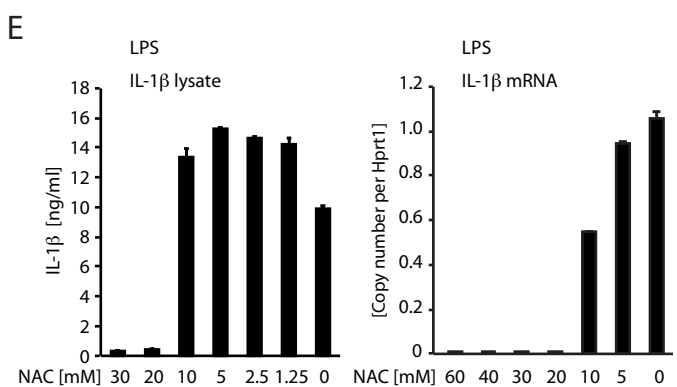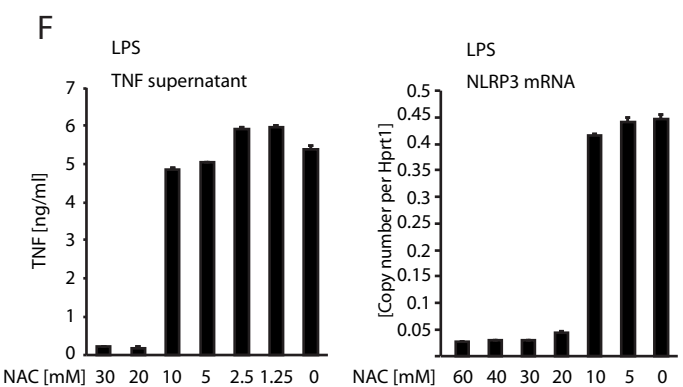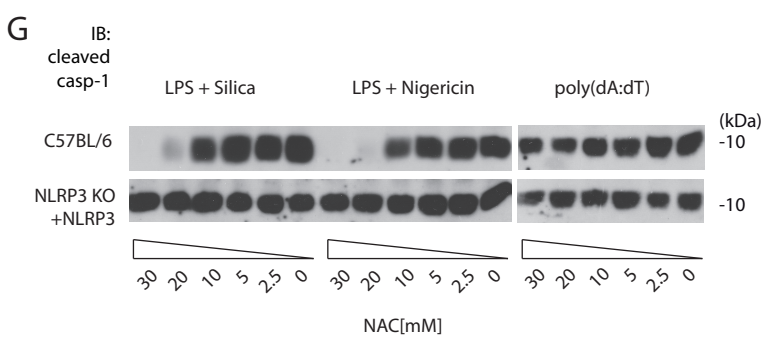

Supplemental Figure 2
